# Supplementary material for: A ratiometric fluorescence nanosensor for glutathione detection based on spatially confined dual-emission of α-lipoic acid-modified gold nanoclusters and silicon nanoparticles
Source: Royal Society of Chemistry journal article supplement (doi:10.1039/d4ay01525h), 2024-01-01
Supplement: d4ay01525h1.pdf [file d4ay01525h1.pdf]

## **Electronic Supplementary Material**

### **Ratiometric fluorescence nanosensor for glutathione detection based on spatially confined dual-emission of $\alpha$ -lipoic acid-modified gold nanoclusters and silicon nanoparticles**

**Abdullah S. Albalawi<sup>\*a</sup>, Alanoud Alkhamali<sup>a</sup>, Mohamed M. El-Wakil<sup>\*b</sup>, Ramadan Ali<sup>a</sup>**

<sup>a</sup> Department of Pharmaceutical Chemistry, Faculty of Pharmacy, University of Tabuk, Tabuk 71491, Saudi Arabia.

<sup>b</sup> Department of Pharmaceutical Analytical Chemistry, Faculty of Pharmacy, Assiut University, Assiut, 71526, Egypt.

#### **Correspondence**

<sup>a</sup> [abs\\_albalawi@ut.edu.sa](mailto:abs_albalawi@ut.edu.sa)

<sup>b</sup> [mohamed.elwakeel@pharm.aun.edu.eg](mailto:mohamed.elwakeel@pharm.aun.edu.eg), [mohamed.mohamoud@ymail.com](mailto:mohamed.mohamoud@ymail.com)

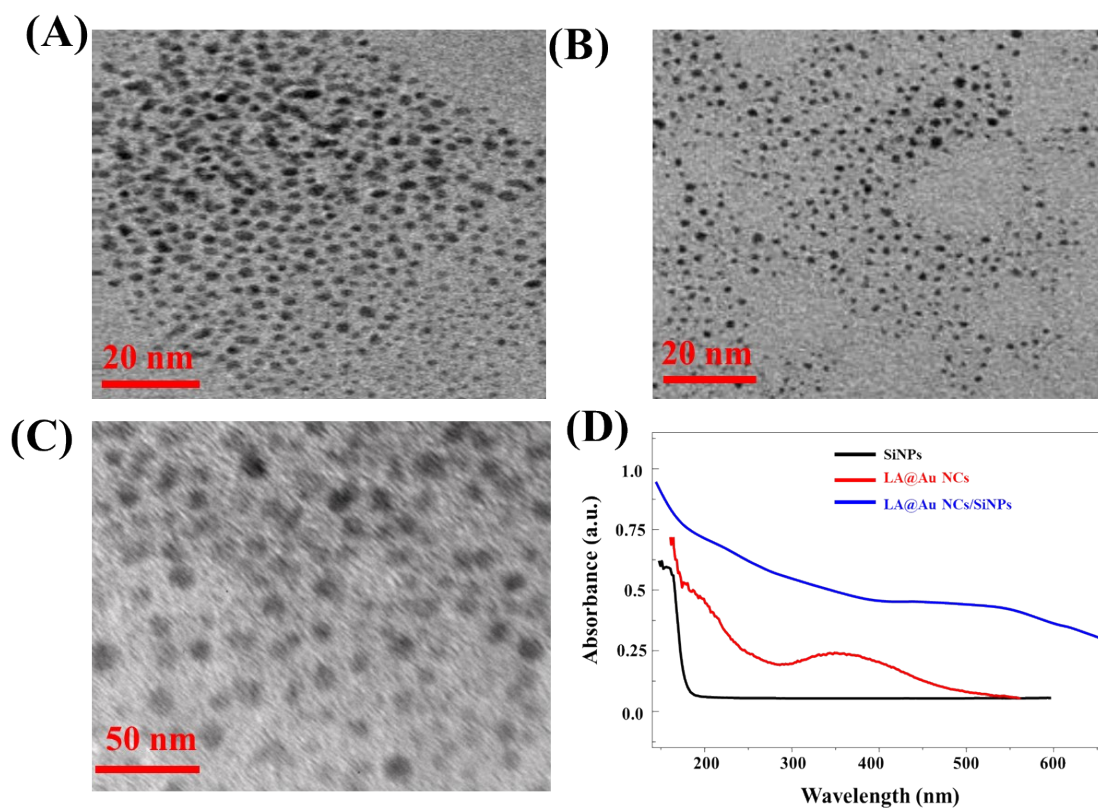

**Fig.S1** TEM images of SiNPs (a), LA@Au NCs (b), and LA@Au NCs/SiNPs (c) while (d) refers to UV/Vis absorption spectra of SiNPs, LA@Au NCs, and LA@Au NCs/SiNPs.

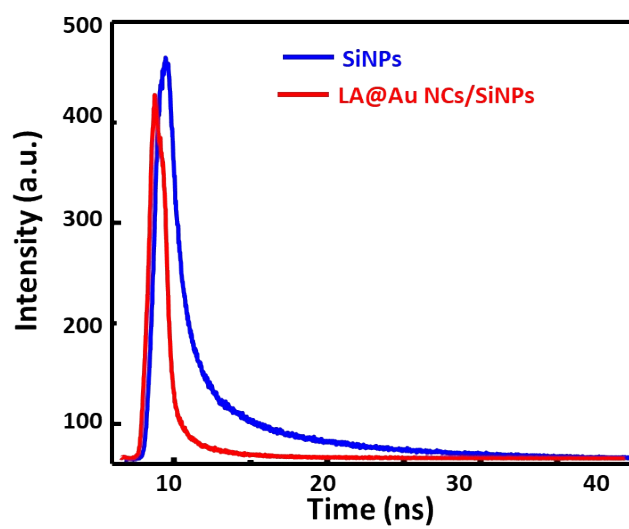

**Fig.S2** Fluorescence lifetimes of SiNPs and LA@Au NCs/SiNPs.

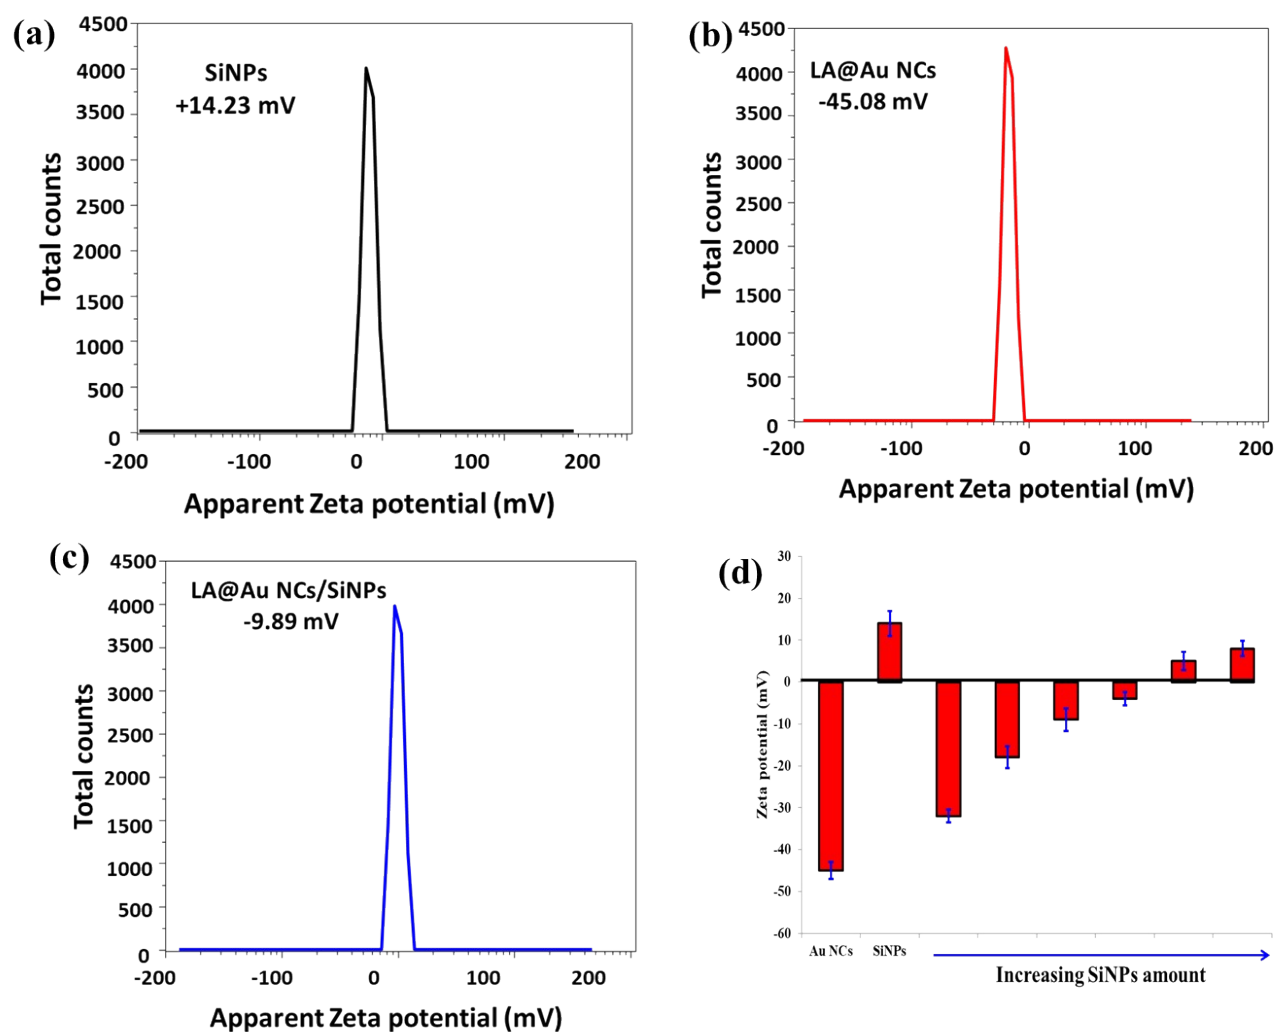

**Fig.S3** Zeta potentials of SiNPs (a), LA@Au NCs (b), and LA@Au NCs/SiNPs (c) while (d) is Zeta potential histograms of SiNPs, LA@Au NCs, and LA@Au NCs with different amounts of SiNPs.

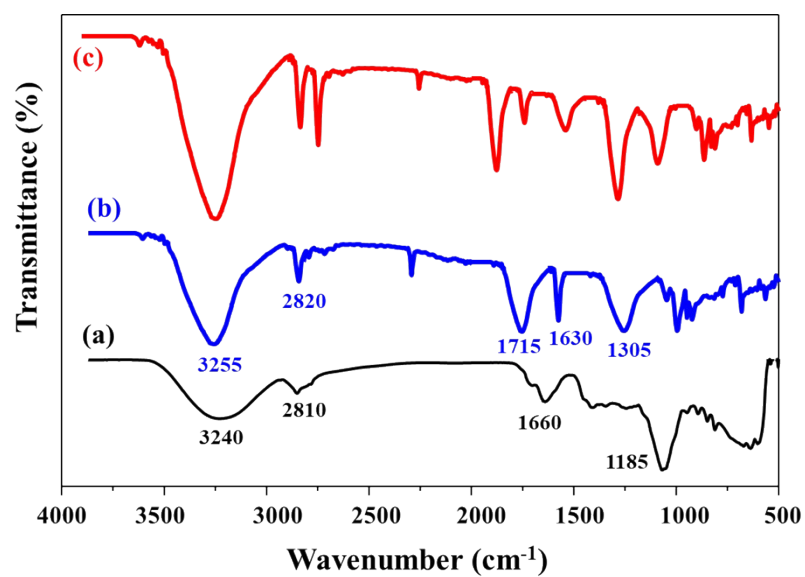

**Fig.S4** FT-IR spectra of SiNPs (a), LA@Au NCs (b), and LA@Au NCs/SiNPs (c).

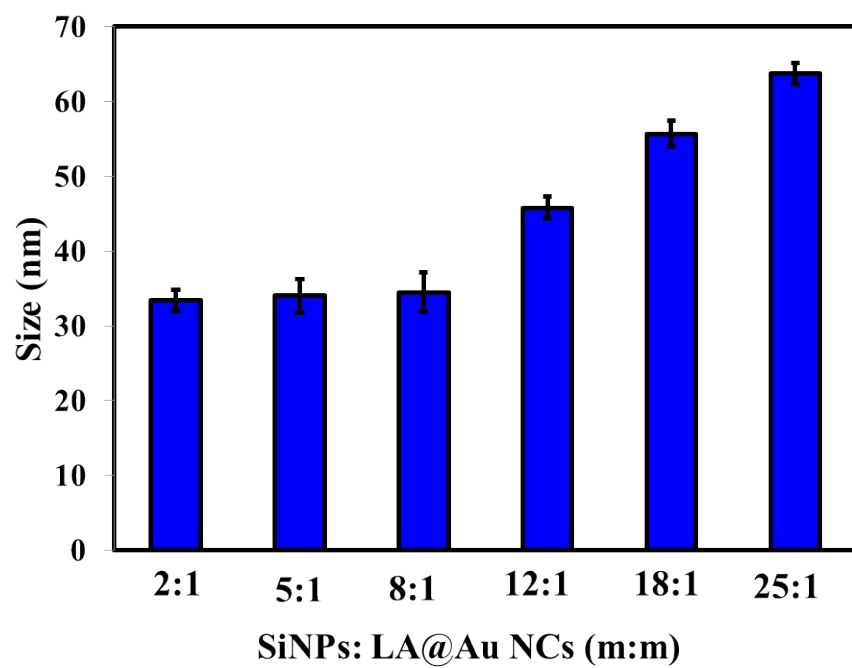

**Fig.S5** DLS of different mass ratios of SiNPs:LA@Au NCs.
